# Supplementary material for: Role of polyvinylpyrrolidone in the electrochemical performance of Li2MnO3 cathode for lithium-ion batteries
Source: Royal Society of Chemistry journal article supplement (doi:10.1039/c8ra10569c), 2019-01-01
Supplement: c8ra10569c1.pdf [file c8ra10569c1.pdf]

## **Supporting Information**

### **Role of polyvinylpyrrolidone in electrochemical performance of $\text{Li}_2\text{MnO}_3$ cathode for lithium-ion batteries**

Ji-Eun Lee, Min-Cheol Kim, Sang-Hyun Moon, Eun-Soo Kim, Yeon-Kyung Shin, Sojeong Choi, Suk-Hui Kwon, Si-Jin Kim, Hye-Jin Kwon, and Kyung-Won Park\*

Department of Chemical Engineering, Soongsil University, Seoul 156-743, Republic of Korea

\* Corresponding author. Tel: 82-2-820-0613. Fax: 82-2-812-5378.

E-mail address: kwpark@ssu.ac.kr. (Prof. K.-W. Park)

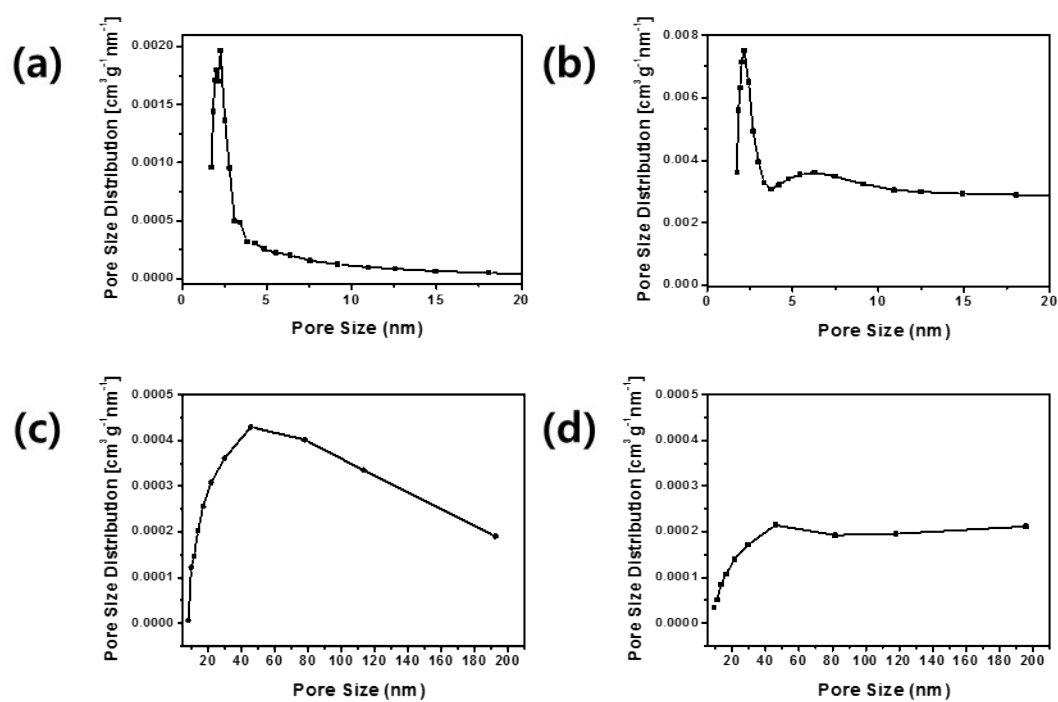

**Figure S1.** Pore size distribution curves of (a) OLO-only, (b) OLO-PVP-400, (c) OLO-PVP-500, and (d) OLO-PVP-600.

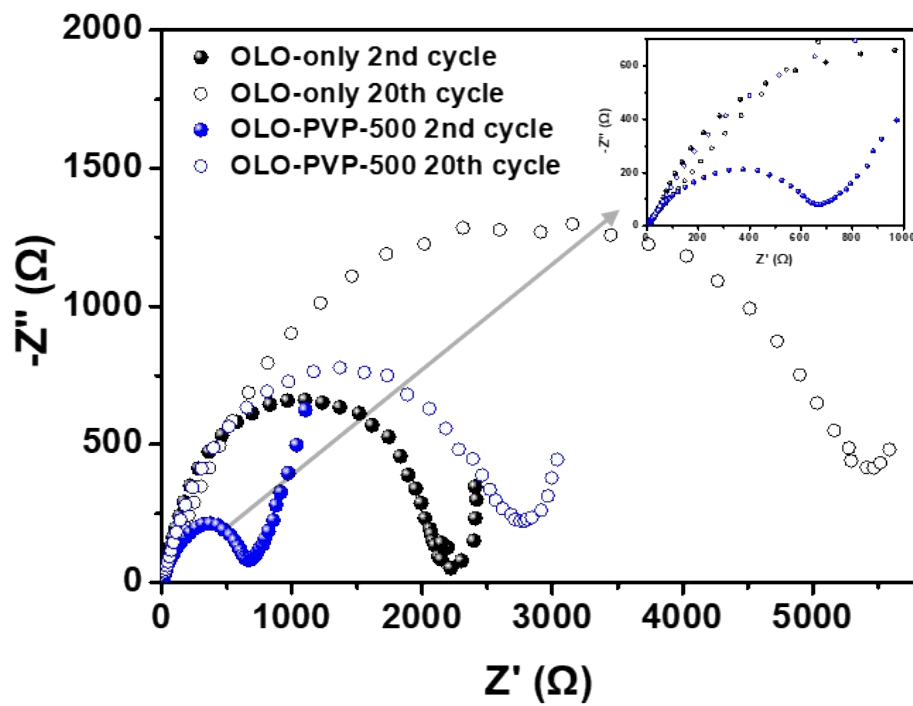

**Figure S2.** Electrochemical impedance spectroscopy spectra of OLO-only and OLO-PVP-500 measured at 4.6 V after 2<sup>nd</sup> and 20<sup>th</sup> cycles.
